# Supplementary material for: Dietary and Serum Antioxidants Associated with Prostate-Specific Antigen for Middle-Aged and Older Men
Source: MDPI journal article supplement (doi:10.3390/nu15153298), 2023-07-25
Supplement: s1 [file s1]

Table S1. Participants' demographic and behavioral factors associated with PSA status for middle-aged men aged 40-64.9

| Factor                                         | Unadjusted <sup>a</sup>           |                                 | Adjusted <sup>a</sup>             |                                 |
|------------------------------------------------|-----------------------------------|---------------------------------|-----------------------------------|---------------------------------|
|                                                | PSA 4-10 vs. PSA<4<br>OR (95% CI) | PSA≥10 vs. PSA<4<br>OR (95% CI) | PSA 4-10 vs. PSA<4<br>OR (95% CI) | PSA≥10 vs. PSA<4<br>OR (95% CI) |
| Age                                            | 1.19 (1.13, 1.24)***              | 1.05 (0.97, 1.14)               | 1.19 (1.13, 1.25)***              | 1.07 (0.98, 1.16)               |
| Race                                           |                                   |                                 |                                   |                                 |
| Non-Hispanic white                             | 1                                 | 1                               | -                                 | -                               |
| Non-Hispanic Black                             | 0.92 (0.53, 1.59)                 | 7.09 (1.65, 30.49)**            |                                   |                                 |
| Other                                          | 1.04 (0.61, 1.77)                 | 3.78 (0.83, 17.14)              |                                   |                                 |
| Income to poverty ratio                        |                                   |                                 |                                   |                                 |
| ≤1                                             | 1                                 | 1                               | 1                                 | 1                               |
| 1.1- 4                                         | 1.11 (0.54, 2.29)                 | 0.08 (0.02, 0.32)***            | 0.86 (0.41, 1.81)                 | 0.07 (0.02, 0.3)***             |
| >4                                             | 1.88 (0.92, 3.84)                 | 0.17 (0.04, 0.72)*              | 1.43 (0.67, 3.08)                 | 0.15 (0.03, 0.66)*              |
| BMI status                                     |                                   |                                 |                                   |                                 |
| <25                                            | 1                                 | 1                               | -                                 | -                               |
| 25-29.9                                        | 1.22 (0.68, 2.2)                  | 2.41 (0.45, 12.86)              |                                   |                                 |
| ≥30                                            | 0.71 (0.4, 1.24)                  | 1.51 (0.24, 9.44)               |                                   |                                 |
| Smoking                                        |                                   |                                 |                                   |                                 |
| Never                                          | 1                                 | 1                               | -                                 | -                               |
| Former                                         | 1.08 (0.67, 1.76)                 | 0.18 (0.03, 1.22)               |                                   |                                 |
| Current                                        | 0.61 (0.32, 1.16)                 | 0.82 (0.18, 3.66)               |                                   |                                 |
| Days of alcohol usage in<br>the past 12 months |                                   |                                 |                                   |                                 |
| ≤3                                             | 1                                 | 1                               | -                                 | -                               |
| 4-50                                           | 0.39 (0.17, 0.91)*                | 0.48 (0.09, 2.52)               |                                   |                                 |
| >50                                            | 0.53 (0.27, 1.06)                 | 0.27 (0.05, 1.57)               |                                   |                                 |

\*: p&lt;0.05, \*\*p&lt;0.01; \*\*\*:p&lt;0.001

<sup>a</sup> weighted multinomial logistic model; OR: odds ratio; CI: confidence interval

Table S2. Participants' demographic and behavioral factors associated with PSA status for older men aged ≥65

| Factor                                      | Unadjusted <sup>a</sup>           |                                 | Adjusted <sup>a</sup>             |                                 |
|---------------------------------------------|-----------------------------------|---------------------------------|-----------------------------------|---------------------------------|
|                                             | PSA 4-10 vs. PSA<4<br>OR (95% CI) | PSA≥10 vs. PSA<4<br>OR (95% CI) | PSA 4-10 vs. PSA<4<br>OR (95% CI) | PSA≥10 vs. PSA<4<br>OR (95% CI) |
| Age                                         | 1.04 (1.01, 1.08)**               | 1.07 (1.01, 1.13)*              | 1.05 (1.01, 1.08)**               | 1.07 (1.01, 1.14)*              |
| Race                                        |                                   |                                 |                                   |                                 |
| Non-Hispanic white                          | 1                                 | 1                               | 1                                 | 1                               |
| Non-Hispanic Black                          | 1.71 (1.19, 2.44)**               | 2.86 (1.5, 5.44)**              | 1.82 (1.24, 2.66)**               | 3.17 (1.6, 6.27)***             |
| Other                                       | 0.8 (0.49, 1.32)                  | 1.39 (0.68, 2.83)               | 0.88 (0.52, 1.48)                 | 1.62 (0.77, 3.39)               |
| Income to poverty ratio                     |                                   |                                 |                                   |                                 |
| ≤1                                          | 1                                 | 1                               | -                                 | -                               |
| 1.1- 4                                      | 0.73 (0.46, 1.14)                 | 1.35 (0.59, 3.09)               |                                   |                                 |
| >4                                          | 0.61 (0.35, 1.06)                 | 1.35 (0.46, 3.93)               |                                   |                                 |
| BMI status                                  |                                   |                                 |                                   |                                 |
| <25                                         | 1                                 | 1                               | -                                 | -                               |
| 25-29.9                                     | 0.75 (0.53, 1.08)                 | 0.58 (0.31, 1.06)               |                                   |                                 |
| ≥30                                         | 0.55 (0.35, 0.86)**               | 0.62 (0.29, 1.31)               |                                   |                                 |
| Smoking                                     |                                   |                                 |                                   |                                 |
| Never                                       | 1                                 | 1                               | -                                 | -                               |
| Former                                      | 0.74 (0.52, 1.06)                 | 0.61 (0.31, 1.19)               |                                   |                                 |
| Current                                     | 0.86 (0.47, 1.58)                 | 0.59 (0.23, 1.48)               |                                   |                                 |
| Days of alcohol usage in the past 12 months |                                   |                                 |                                   |                                 |
| ≤3                                          | 1                                 | 1                               | -                                 | -                               |
| 4-50                                        | 0.92 (0.54, 1.54)                 | 1.02 (0.34, 3.06)               |                                   |                                 |
| >50                                         | 1.31 (0.79, 2.17)                 | 1.14 (0.44, 2.96)               |                                   |                                 |

\*: p&lt;0.05, \*\*p&lt;0.01; \*\*\*:p&lt;0.001

<sup>a</sup> weighted multinomial logistic model; OR: odds ratio; CI: confidence interval
